# Supplementary material for: A Systematic Study on the Optimal Nucleotide Analogue Concentration and Rate Limiting Nucleotide of the SARS-CoV-2 RNA-Dependent RNA Polymerase
Source: MDPI journal article supplement (doi:10.3390/ijms23158302), 2022-07-27
Supplement: s1 [file s1]

**A**

| Cordycepin-TP            |  |  |  |                       |  |  |  |                       |  |  |  | GC-443902             |  |  |  |                       |  |  |  |  |  |  |  |
|--------------------------|--|--|--|-----------------------|--|--|--|-----------------------|--|--|--|-----------------------|--|--|--|-----------------------|--|--|--|--|--|--|--|
|                          |  |  |  | $\Delta$ ATP          |  |  |  | $\Delta$ ATP          |  |  |  |                       |  |  |  |                       |  |  |  |  |  |  |  |
| 10 $\mu$ M, $\Delta$ ATP |  |  |  | 10 $\mu$ M            |  |  |  | 1 mM                  |  |  |  | 100 $\mu$ M           |  |  |  | 10 $\mu$ M            |  |  |  |  |  |  |  |
| NTP conc.                |  |  |  | NTP conc.             |  |  |  | NTP conc.             |  |  |  | NTP conc.             |  |  |  | NTP conc.             |  |  |  |  |  |  |  |
| Drug conc. [ $\mu$ M]    |  |  |  | Drug conc. [ $\mu$ M] |  |  |  | Drug conc. [ $\mu$ M] |  |  |  | Drug conc. [ $\mu$ M] |  |  |  | Drug conc. [ $\mu$ M] |  |  |  |  |  |  |  |
| 500                      |  |  |  | 500                   |  |  |  | 500                   |  |  |  | 500                   |  |  |  | 500                   |  |  |  |  |  |  |  |
| 50                       |  |  |  | 50                    |  |  |  | 50                    |  |  |  | 50                    |  |  |  | 50                    |  |  |  |  |  |  |  |
| 5                        |  |  |  | 5                     |  |  |  | 5                     |  |  |  | 5                     |  |  |  | 5                     |  |  |  |  |  |  |  |
| 0.5                      |  |  |  | 0.5                   |  |  |  | 0.5                   |  |  |  | 0.5                   |  |  |  | 0.5                   |  |  |  |  |  |  |  |
| ctrl                     |  |  |  | ctrl                  |  |  |  | ctrl                  |  |  |  | ctrl                  |  |  |  | ctrl                  |  |  |  |  |  |  |  |

RNA hydrolysis ladder

GAUAGGGG-35  
GGA  
UC-30  
ACA  
CU  
A  
A-25  
A  
A  
U  
U  
A-20

40mer

20mer

Detailed description: The image shows a denaturing polyacrylamide gel electrophoresis (PAGE) of RNA hydrolysis products. The gel is divided into two main sections: Cordycepin-TP (left) and GC-443902 (right). Each section has 12 lanes. The lanes are grouped by NTP concentration (500, 50, 5, 0.5  $\mu$ M) and  $\Delta$ ATP concentration (10  $\mu$ M, 1 mM, 100  $\mu$ M). The leftmost and rightmost lanes of each section are RNA ladders. The left ladder is labeled '40mer' and '20mer' with arrows. The right ladder is labeled 'RNA hydrolysis ladder' and 'GAUAGGGG-35' through 'A-20'. A red arrow points to a band in the 10th lane of the GC-443902 section, and a green arrow points to a band in the 1st lane of the Cordycepin-TP section.

The reactions shown are similar to the one in Figure 1. But resolved on a sequencing gel with an RNA hydrolysis ladder to resolve the inhibitory properties on a nucleotide level. Cordycepin-TP (lane 2-11) under inhibitory conditions leads to polymerization termination after its first incorporation, as indicated by the green arrow. The inhibition of GS-443902 (lane 12-22) takes place +3 nucleotides after its first incorporation, indicated by a red arrow.
